# Supplementary material for: Crystal structure, spectroscopy, DFT, and thermal studies of 3-cyano-2(1 H )-pyridones as potential anticancer agents
Source: Royal Society of Chemistry journal article supplement (doi:10.1039/d4ra04563g), 2024-01-01
Supplement: d4ra04563g1.pdf [file d4ra04563g1.pdf]

## Crystal Structure, Spectroscopy, DFT, and Thermal Studies of 3-Cyano-2(1*H*)-Pyridones as Potential Anticancer Agents

Diana Hurtado-Rodríguez,<sup>a</sup> Diana Becerra,<sup>a</sup> Hugo Rojas,<sup>a</sup> Jovanny A. Gómez Castaño,<sup>\*b</sup> Mario A. Macías <sup>\*c</sup> and Juan-Carlos Castillo <sup>\*a</sup>

<sup>a</sup> Grupo de Catálisis de la UPTC, Escuela de Ciencias Químicas, Universidad Pedagógica y Tecnológica de Colombia, Avenida Central del Norte 39–115, Tunja 150003, Colombia

<sup>b</sup> Grupo Química-Física Molecular y Modelamiento Computacional (QUIMOL), Escuela de Ciencias Químicas, Universidad Pedagógica y Tecnológica de Colombia, Avenida Central del Norte 39–115, Tunja 150003, Colombia

<sup>c</sup> Crystallography and Chemistry of Materials, Department of Chemistry, Universidad de los Andes, Carrera 1 No. 18A–10, Bogotá 111711, Colombia

\* Correspondence E-mails: [jovanny.gomez@uptc.edu.co](mailto:jovanny.gomez@uptc.edu.co), [ma.maciasl@uniandes.edu.co](mailto:ma.maciasl@uniandes.edu.co), [juan.castillo06@uptc.edu.co](mailto:juan.castillo06@uptc.edu.co)

### SUPPORTING INFORMATION

|    |                                                                        |     |
|----|------------------------------------------------------------------------|-----|
| 1. | Copies of FT–IR spectra for compounds <b>4a–c</b> .....                | S2  |
| 2. | Copies of HRMS spectra for compounds <b>4a–c</b> .....                 | S3  |
| 3. | Copies of NMR spectra for compounds <b>4a–c</b> .....                  | S5  |
| 4. | Mean growth, GI%, and lethality values for compounds <b>4a–c</b> ..... | S13 |
| 5. | Crystallographic data of compounds <b>4a–c</b> .....                   | S16 |

# 1. Copies of FT-IR spectra for compounds 4a-c

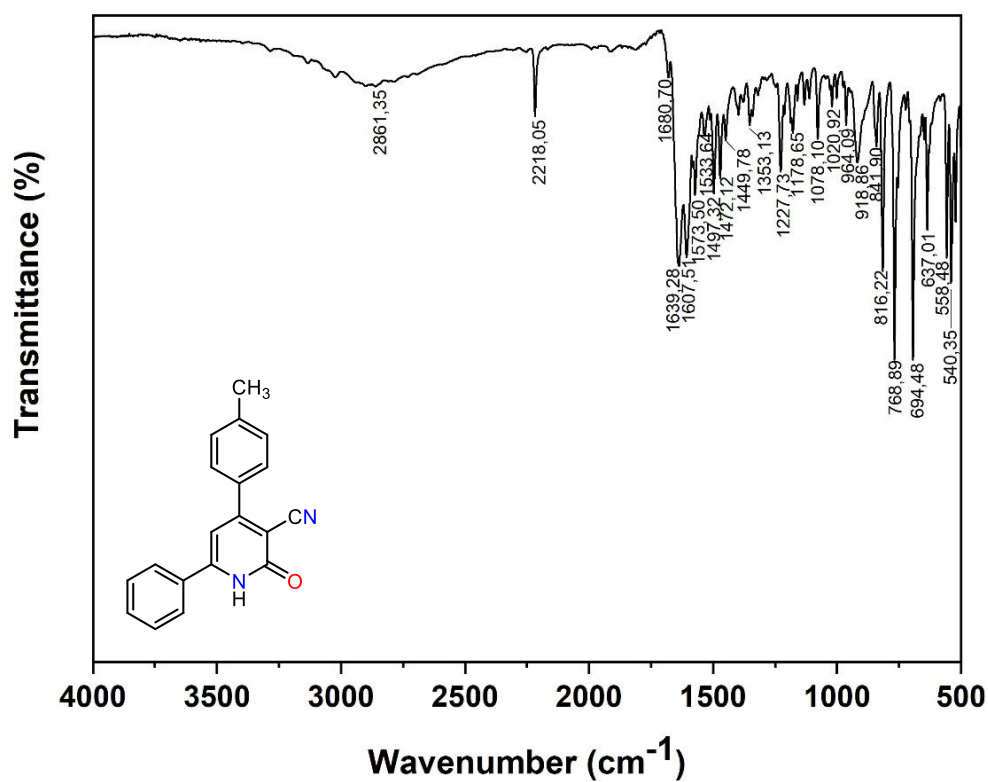

Figure S1. FT-IR spectrum for compound 4a.

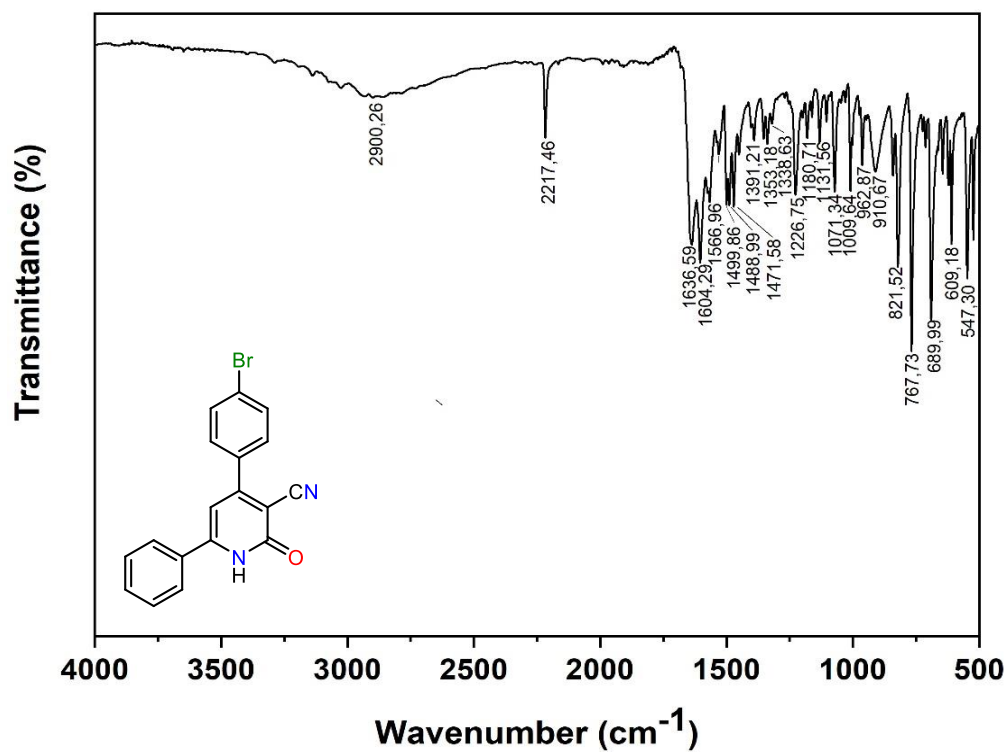

Figure S2. FT-IR spectrum for compound 4b.

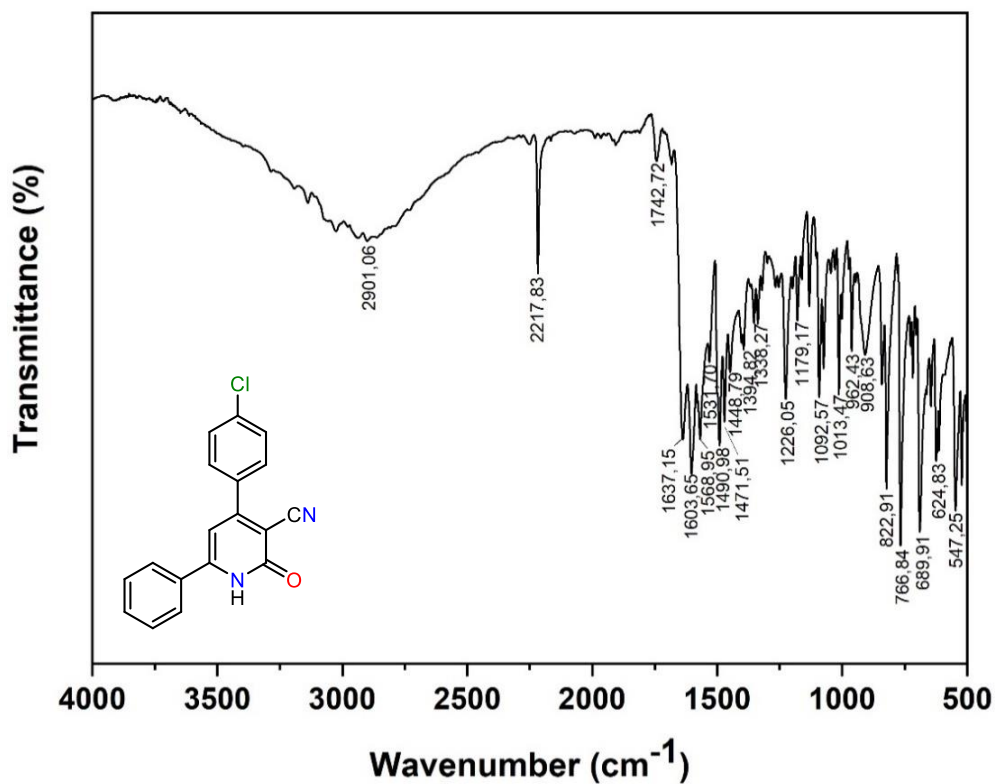

Figure S3. FT-IR spectrum for compound 4c.

## 2. Copies of HRMS spectra for compounds 4a–c

### User Spectra

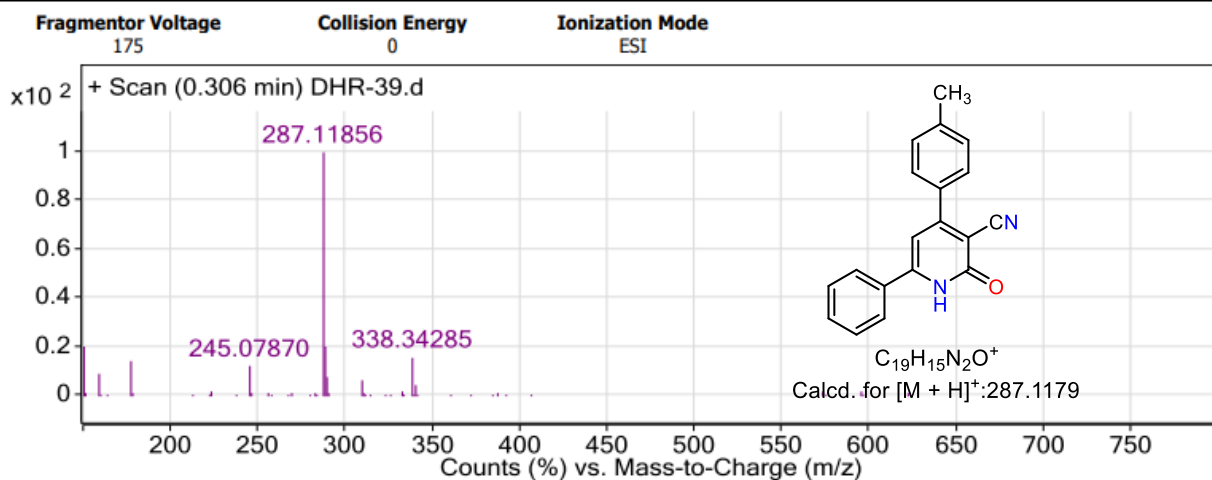

Figure S4. HRMS spectrum for compound 4a.

## User Spectra

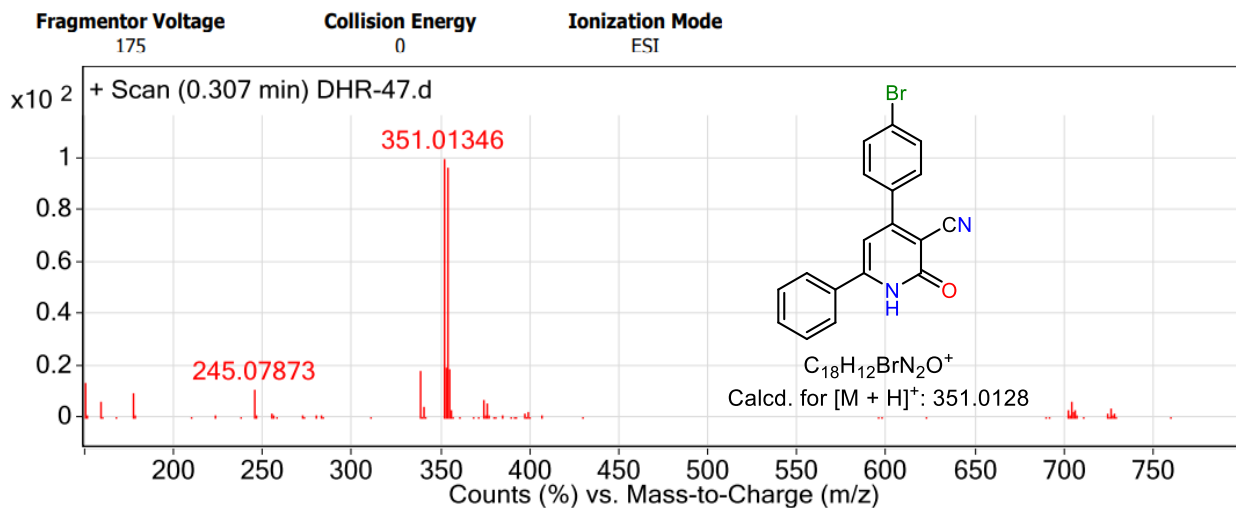

Figure S5. HRMS spectrum for compound **4b**.

## User Spectra

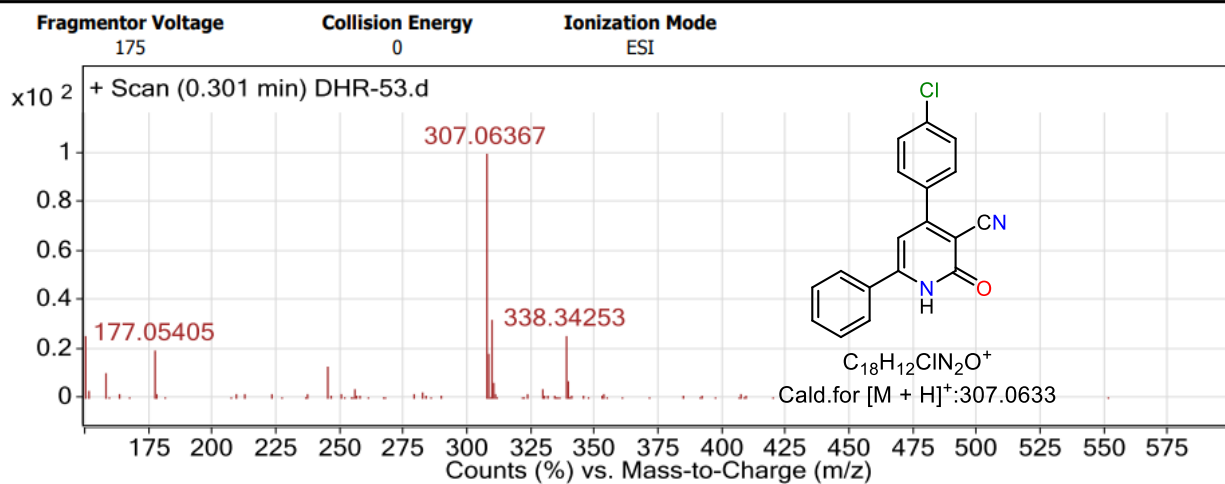

Figure S6. HRMS spectrum for compound **4c**.

### 3. Copies of NMR spectra for compounds 4a–c

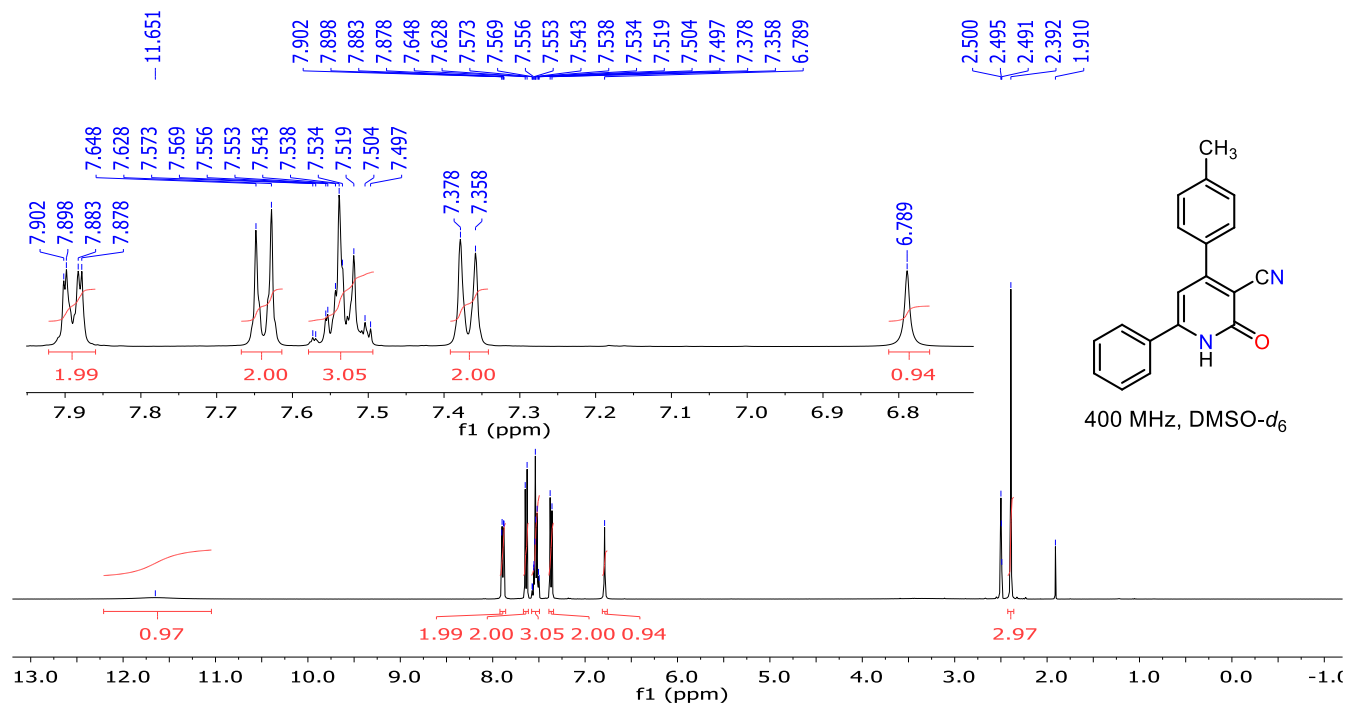

**Figure S7.  $^1\text{H}$  NMR spectrum for compound 4a.**

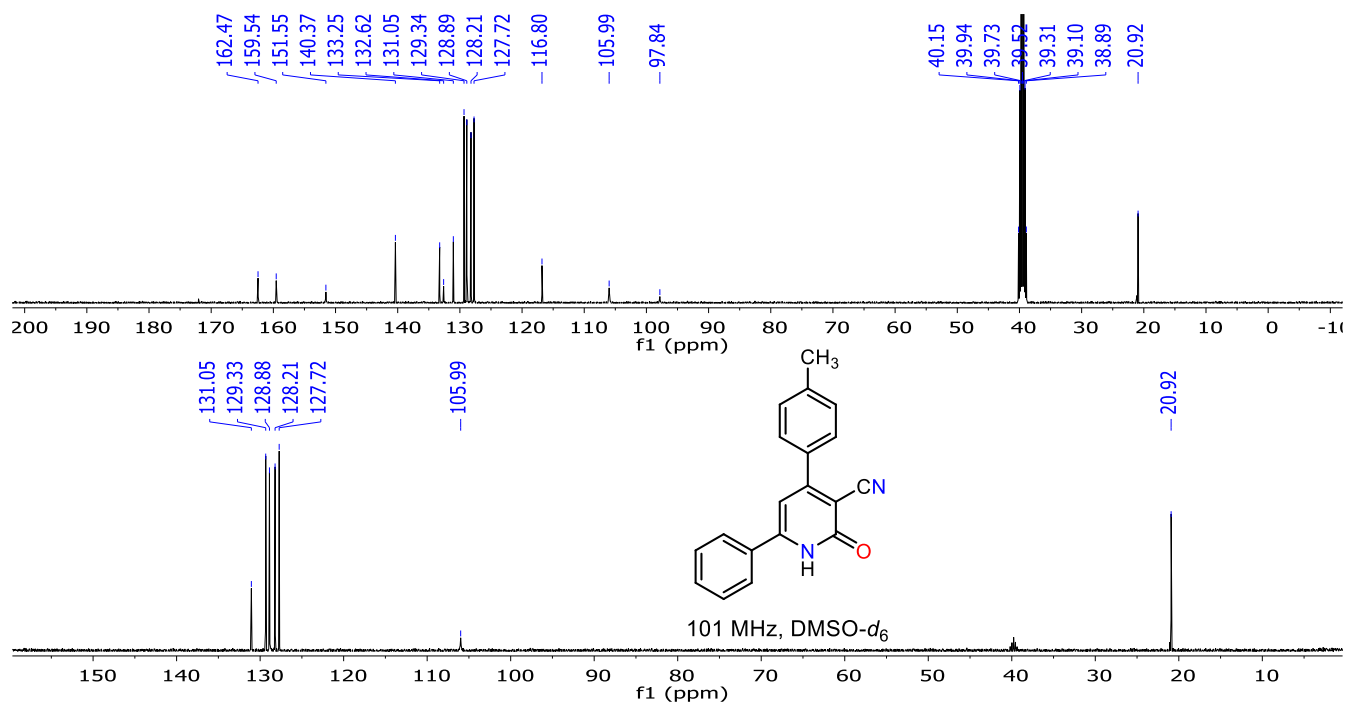

**Figure S8.  $^{13}\text{C}\{^1\text{H}\}$  NMR and DEPT-135 spectra for compound 4a.**

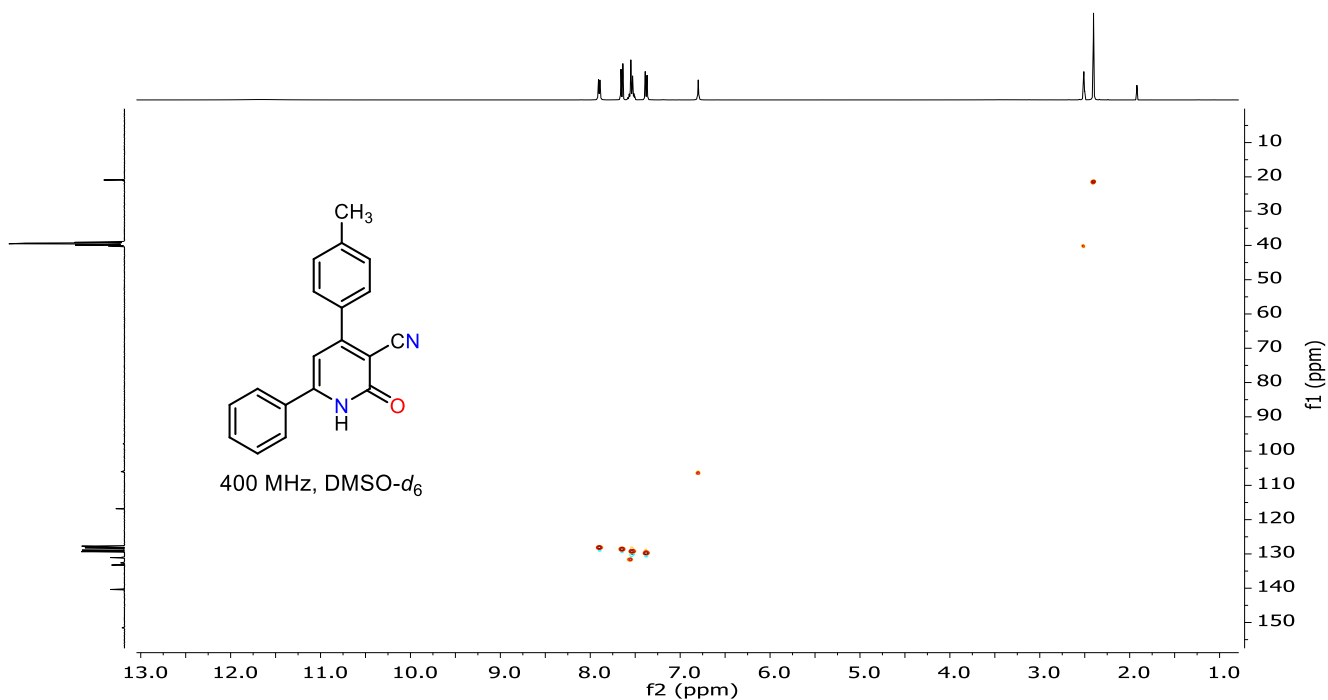

**Figure S9.** HSQC spectrum for compound **4a**.

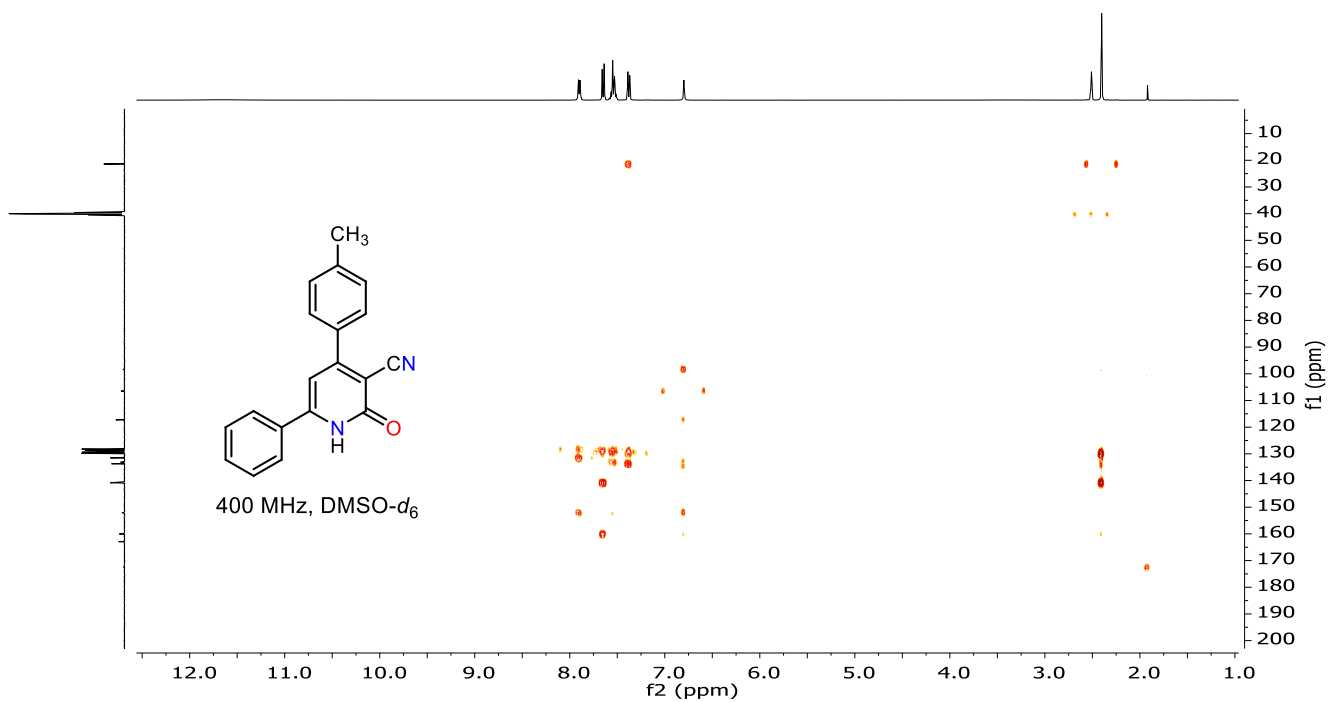

**Figure S10.** HMBC spectrum for compound **4a**.

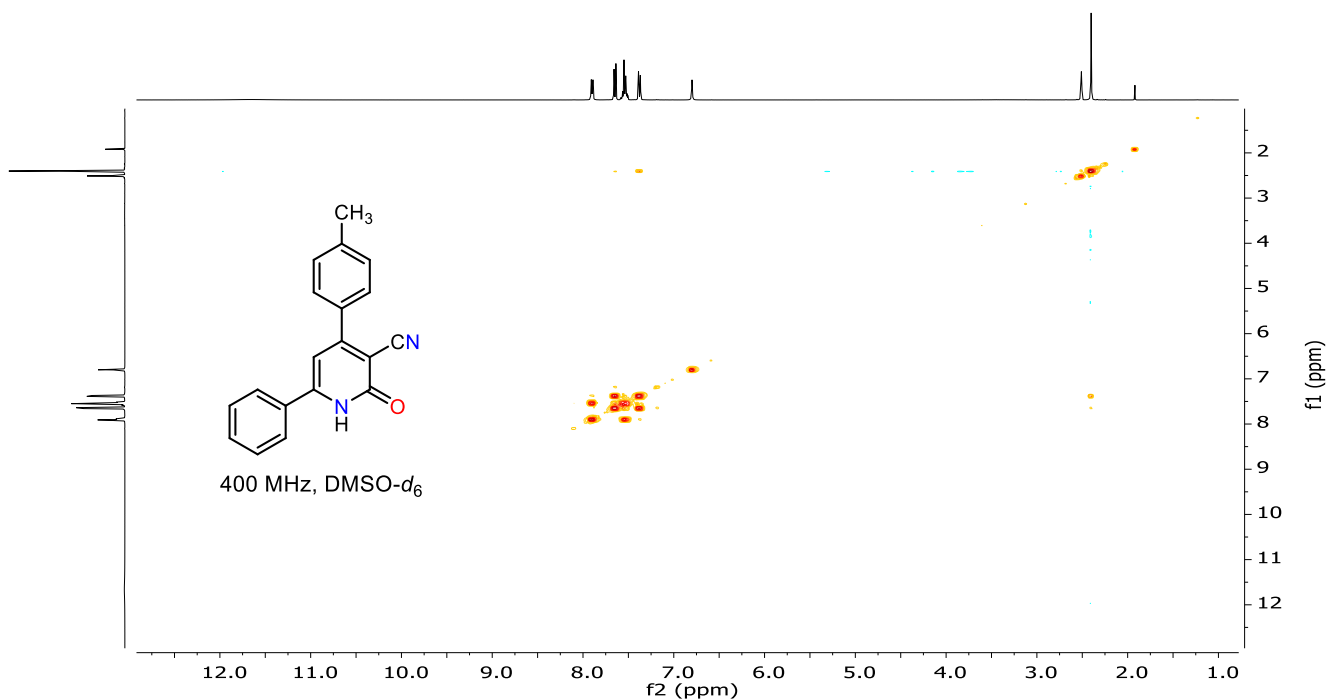

Figure S11. COSY spectrum for compound **4a**.

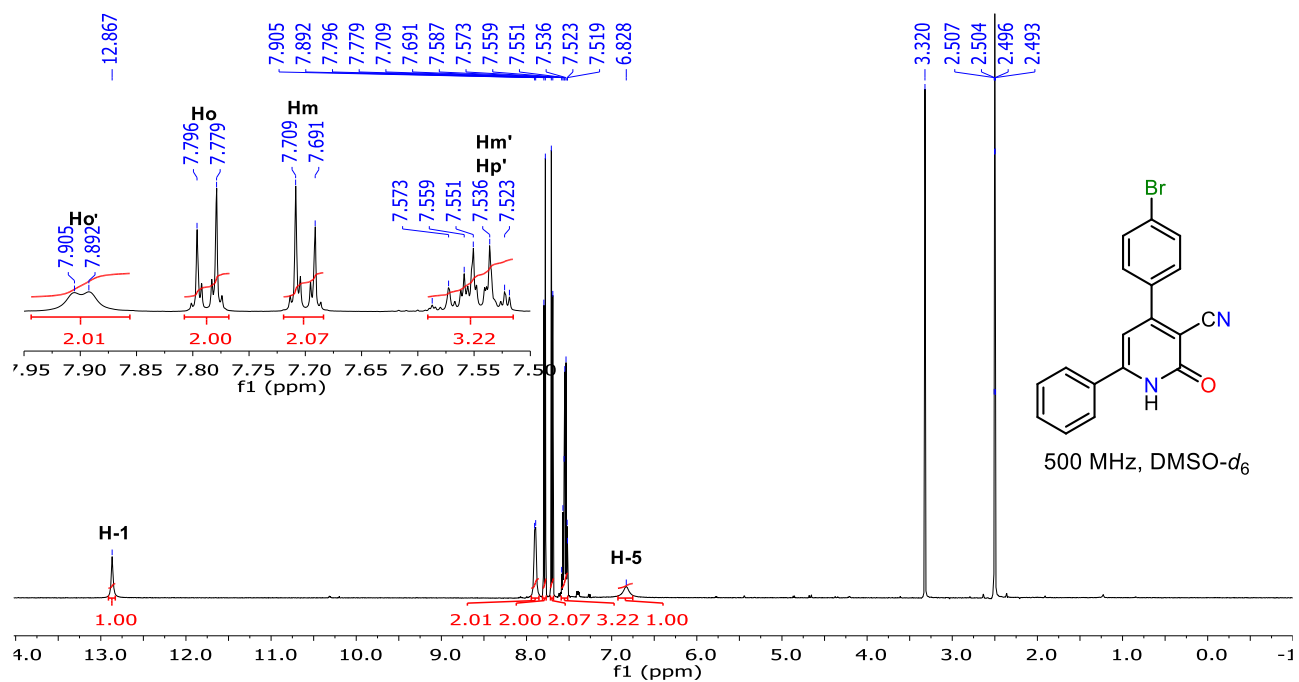

Figure S12.  $^1\text{H}$  NMR spectrum for compound **4b**.

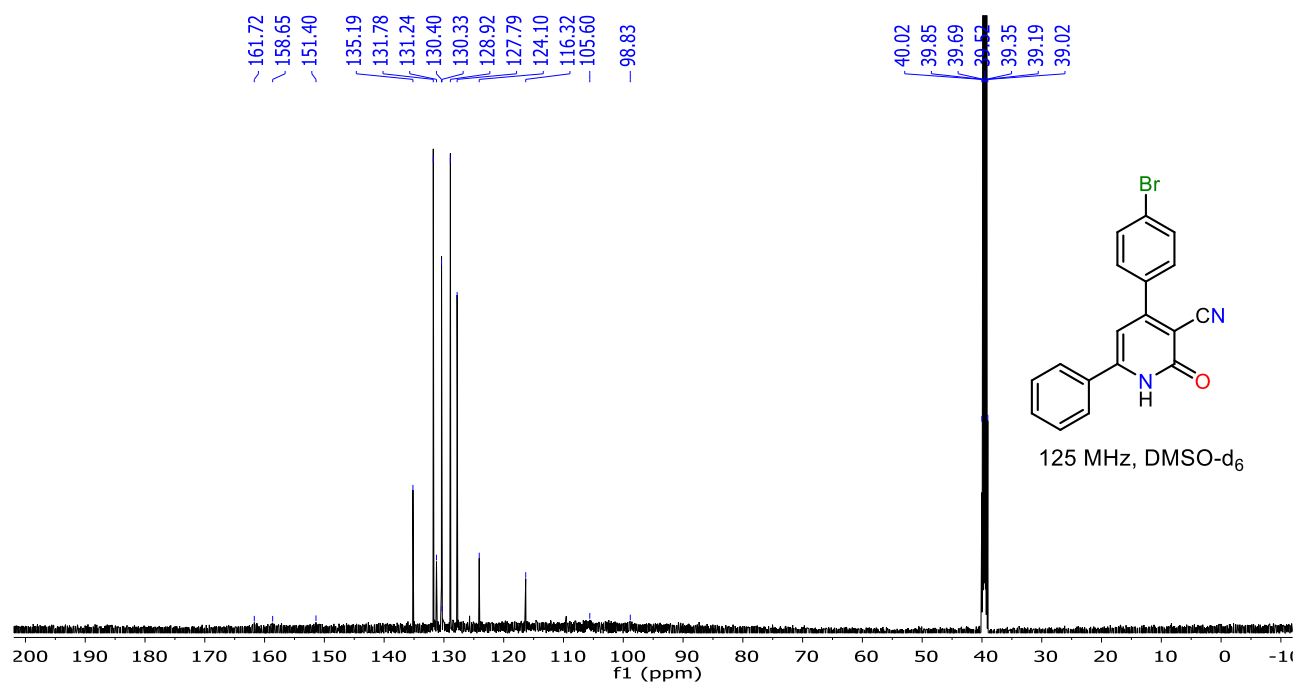

**Figure S13.**  $^{13}\text{C}\{^1\text{H}\}$  NMR spectrum for compound **4b**.

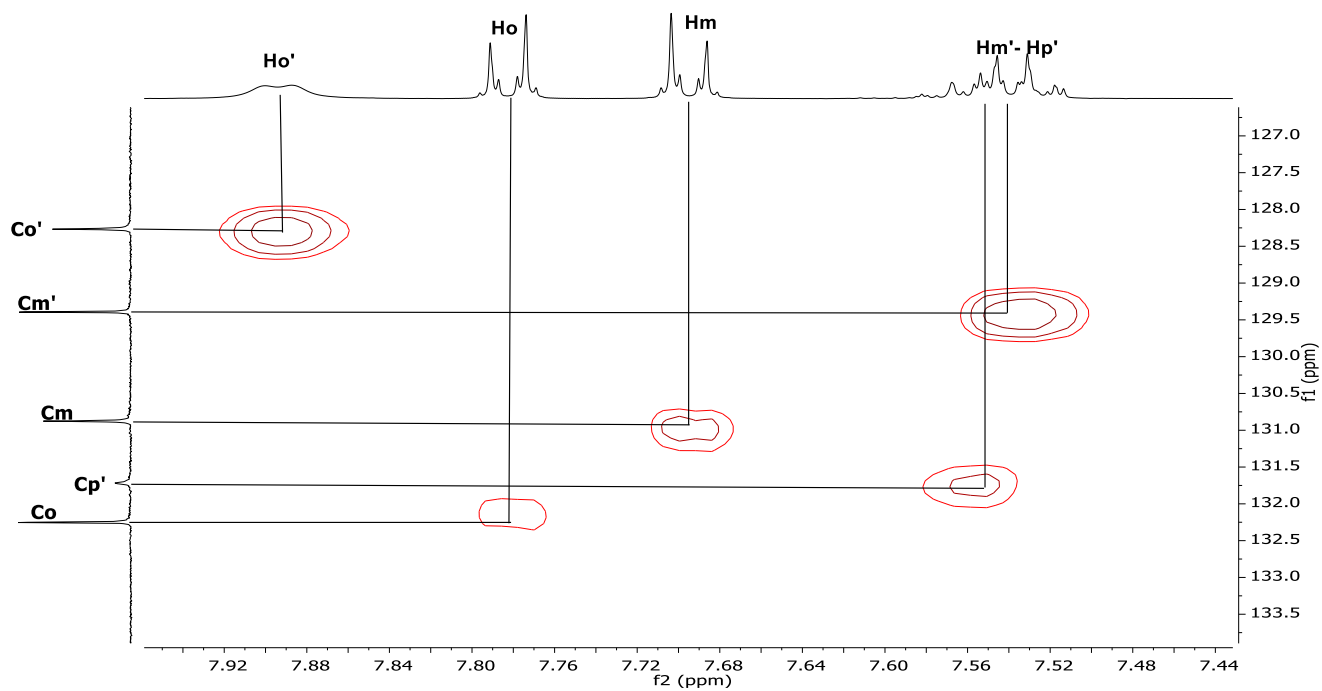

**Figure S14.** HSQC spectrum for compound **4b**.



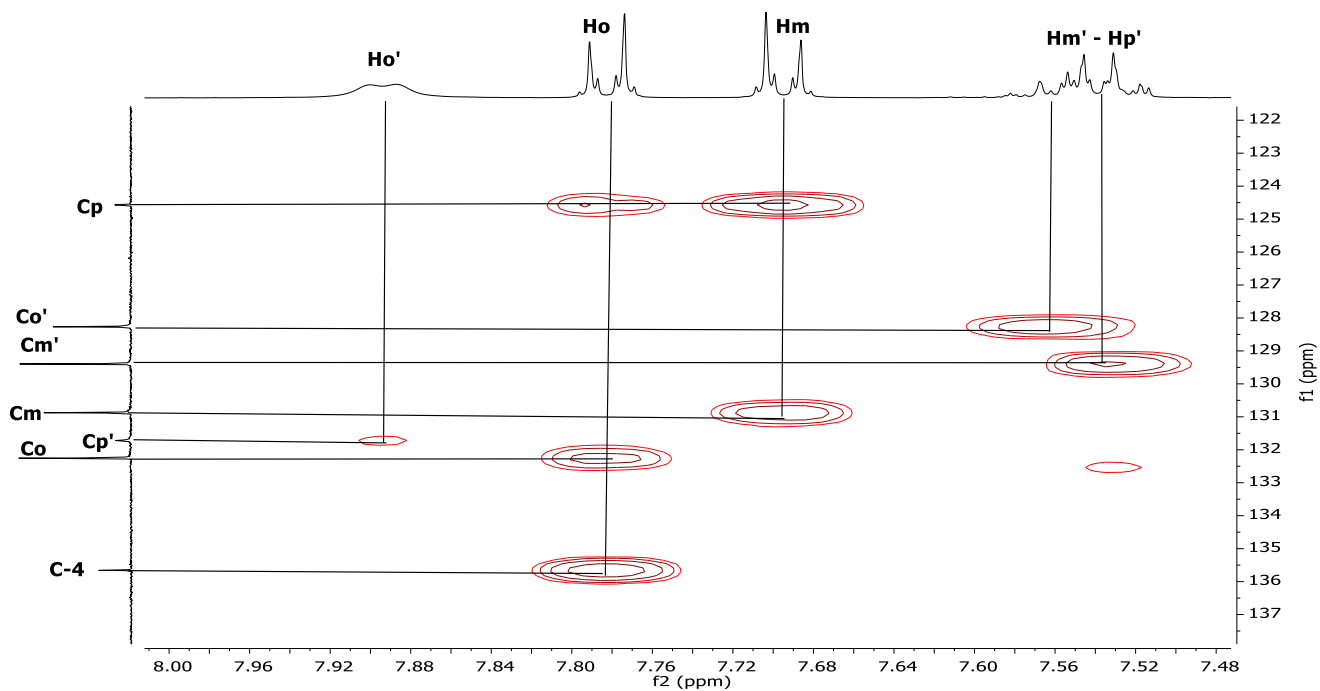

**Figure S15.** HMBC spectrum for compound **4b**.

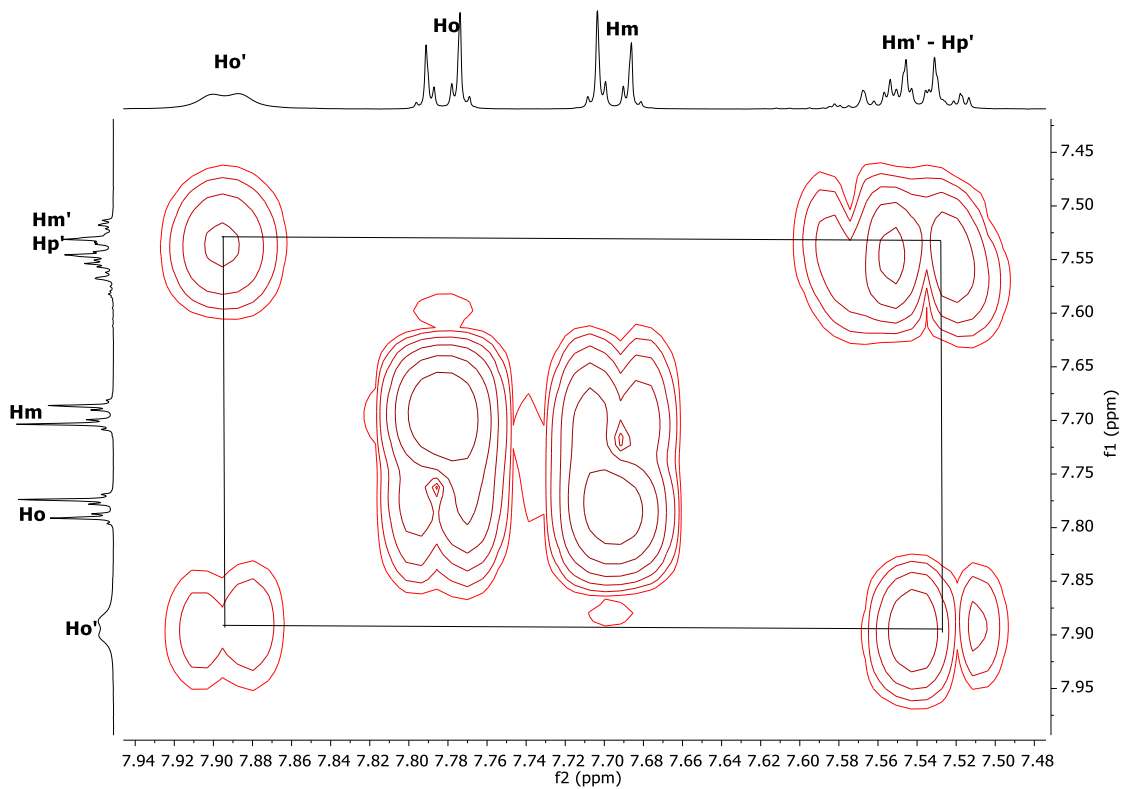

**Figure S16.** COSY spectrum for compound **4b**.

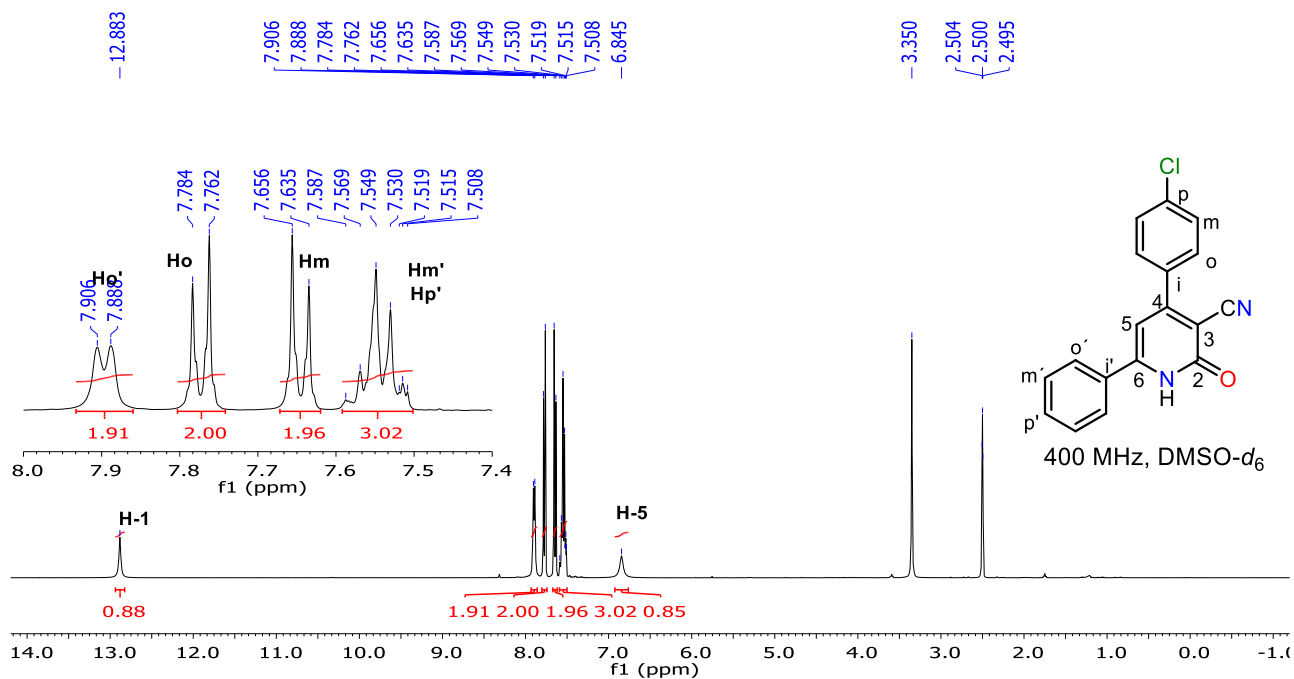

Figure S17.  $^1\text{H}$  NMR spectrum for compound 4c.

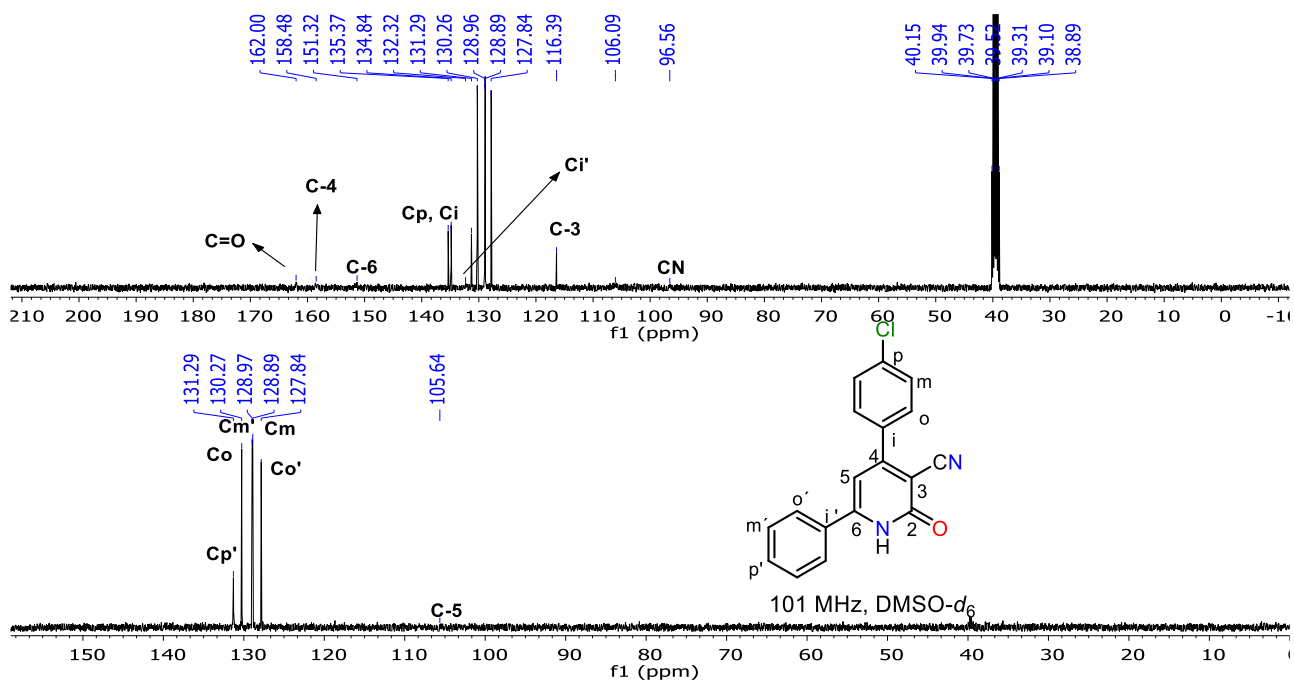

Figure S18.  $^{13}\text{C}\{^1\text{H}\}$  NMR and DEPT-135 spectra for compound 4c.

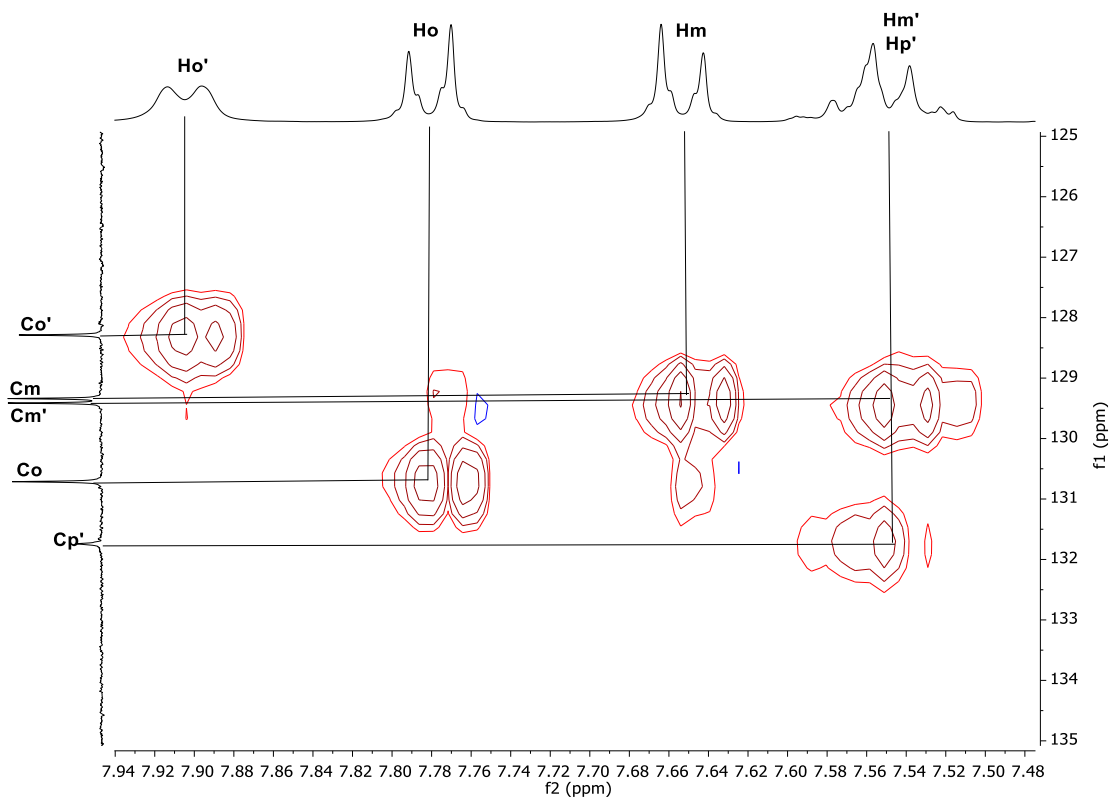

**Figure S19.** HSQC spectrum for compound **4c**.

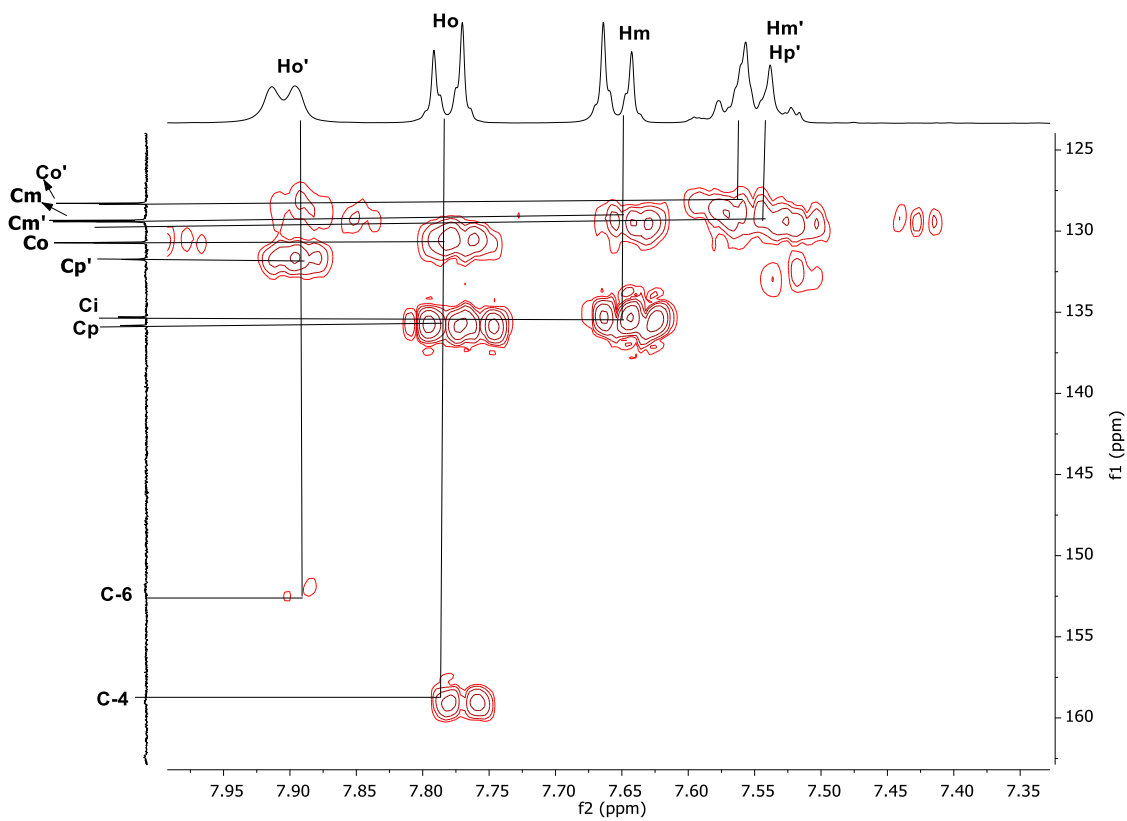

**Figure S20.** HMBC spectrum for compound **4c**.

**Table S1.** Assignments of  $^1\text{H}$  and  $^{13}\text{C}\{^1\text{H}\}$  NMR signals along with HMBC correlations for compound **4c**.

| Number    | $\delta_{\text{H}}$ (Multiplicity $J$ in Hz) | $\delta_{\text{C}}$ (ppm) | HMBC ( $^1\text{H}$ - $^{13}\text{C}$ ) |
|-----------|----------------------------------------------|---------------------------|-----------------------------------------|
| <b>2</b>  | --                                           | 162.0                     | --                                      |
| <b>3</b>  | --                                           | 116.4                     | --                                      |
| <b>4</b>  | --                                           | 158.5                     | Ho ( $^3J$ )                            |
| <b>5</b>  | 6.84 (s)                                     | 105.6                     | --                                      |
| <b>6</b>  | --                                           | 151.3                     | Ho' ( $^3J$ )                           |
| <b>CN</b> | --                                           | 96.6                      | --                                      |
| <i>i</i>  | --                                           | 134.8                     | Hm ( $^3J$ )                            |
| <i>o</i>  | 7.77 (d, $J = 8.8$ )                         | 130.3                     | --                                      |
| <i>m</i>  | 7.64 (d, $J = 8.4$ )                         | 128.9                     | --                                      |
| <i>p</i>  | --                                           | 135.4                     | Ho ( $^3J$ )                            |
| <i>i'</i> | --                                           | 132.3                     | --                                      |
| <i>o'</i> | 7.90 (d, $J = 7.2$ )                         | 127.8                     | Hm' ( $^2J$ )<br>Hp' ( $^3J$ )          |
| <i>m'</i> | 7.51–7.59 (m)                                | 129.0                     | Hp' ( $^2J$ )                           |
| <i>p'</i> | 7.51–7.59 (m)                                | 131.3                     | Ho' ( $^3J$ )                           |
| <b>NH</b> | 12.88 (s)                                    | --                        | --                                      |

#### 4. Mean growth, GI%, and lethality values for compounds 4a–c

**Table S2.** Mean growth, %GI, and lethality values displayed by the tested compound **4a** against 60 NCI human cancer cell lines at 10  $\mu$ M.

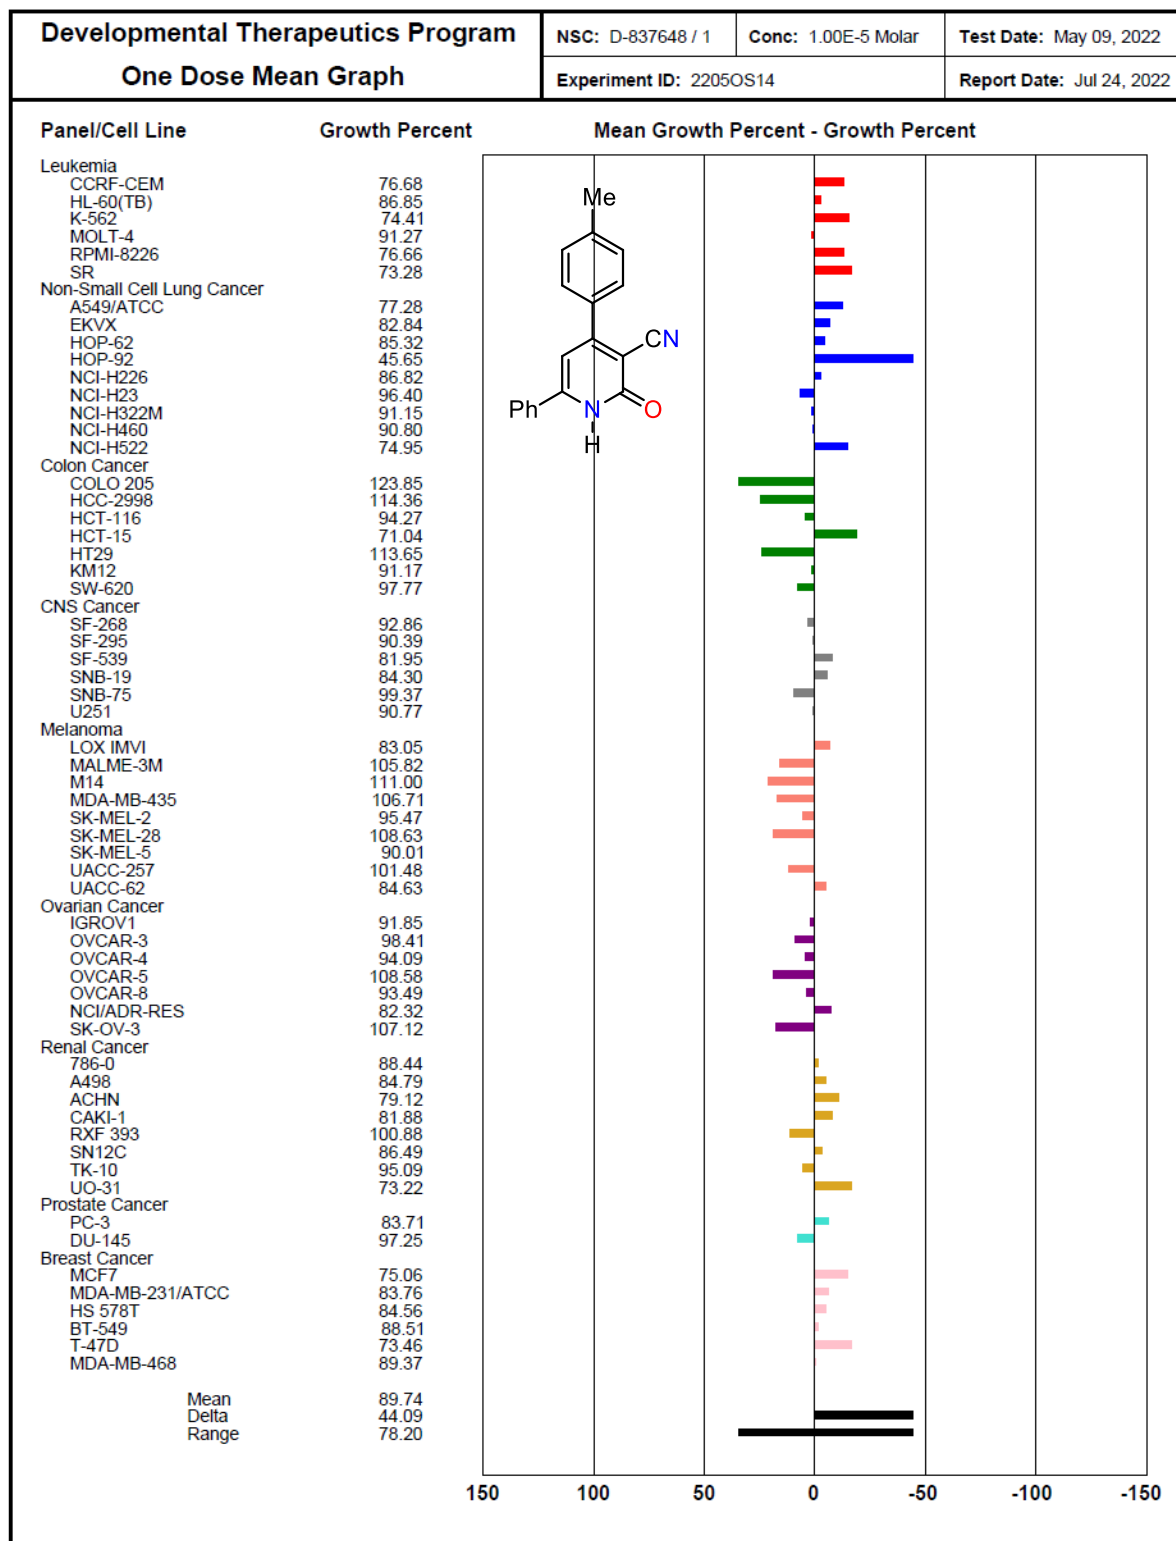

**Table S3.** Mean growth, %GI, and lethality values displayed by the tested compound **4b** against 60 NCI human cancer cell lines at 10  $\mu$ M.

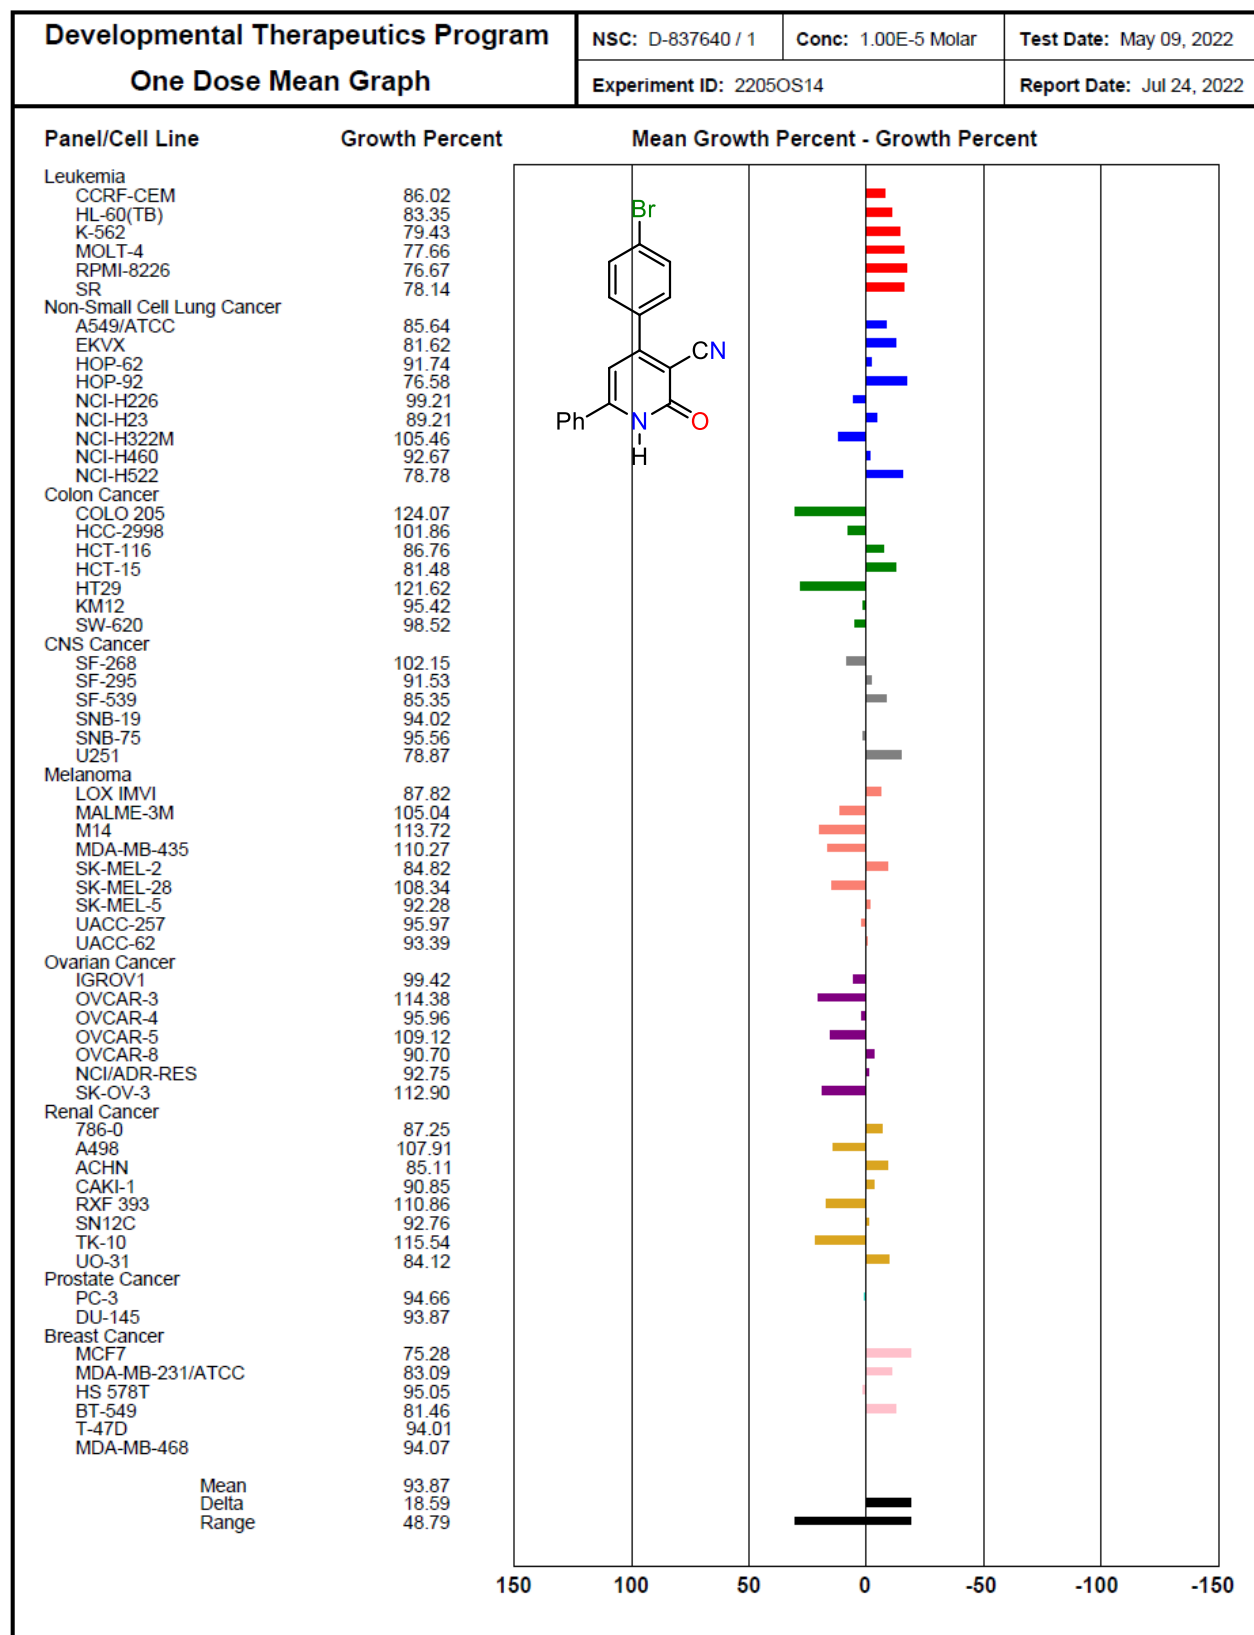

**Table S4.** Mean growth, %GI, and lethality values displayed by the tested compound **4c** against 60 NCI human cancer cell lines at 10  $\mu$ M.

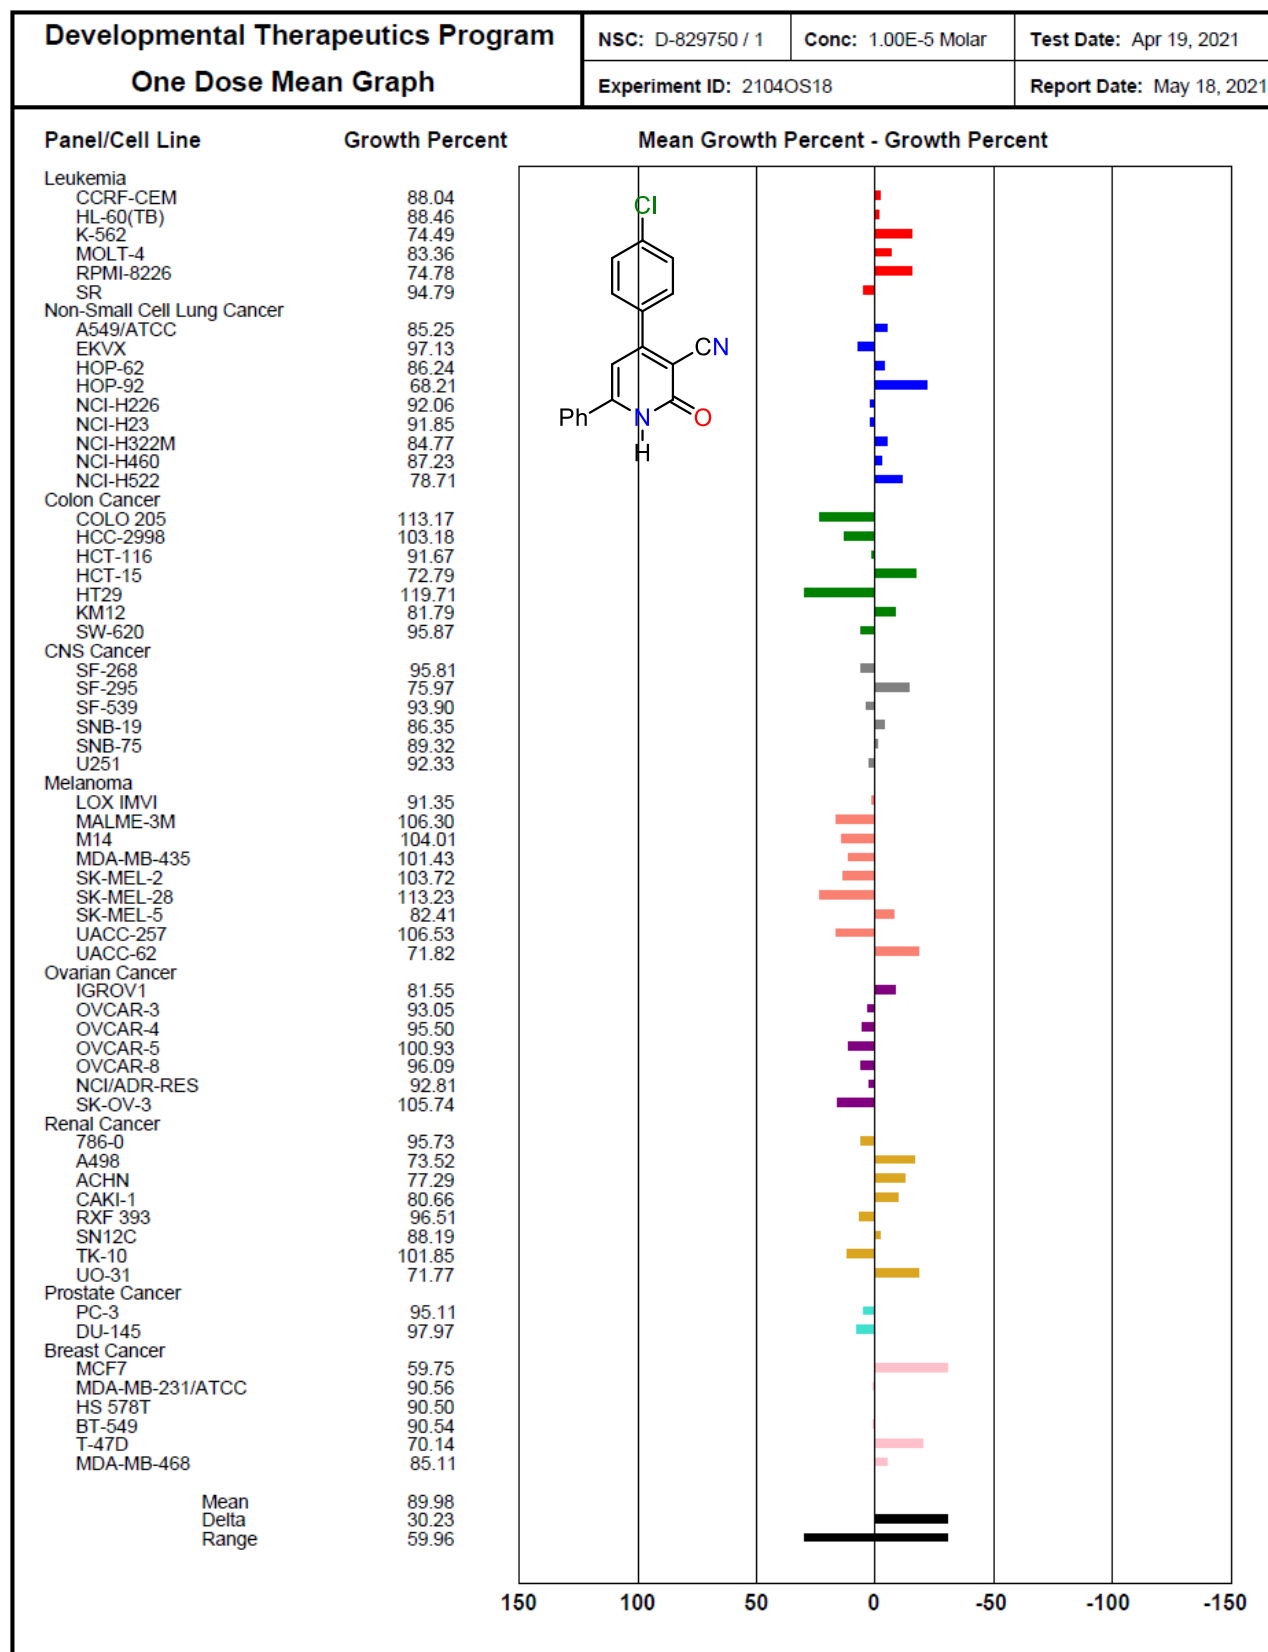

## 5. Crystallographic data of compounds 4a–c

**Table S5.** X-ray crystallographic data and structural refinement for compounds 4a–c.

| <b>Crystal Data</b>                                                        | <b>Compound 4a</b>                                                  | <b>Compound 4b</b>                                                  | <b>Compound 4c</b>                                                  |
|----------------------------------------------------------------------------|---------------------------------------------------------------------|---------------------------------------------------------------------|---------------------------------------------------------------------|
| Chemical Formula                                                           | C <sub>19</sub> H <sub>14</sub> N <sub>2</sub> O                    | C <sub>18</sub> H <sub>11</sub> BrN <sub>2</sub> O                  | C <sub>18</sub> H <sub>11</sub> ClN <sub>2</sub> O                  |
| M <sub>r</sub>                                                             | 286.32                                                              | 351.19                                                              | 306.74                                                              |
| Solvent for Crystallization                                                | MeOH/DMF (1:5, v/v)                                                 | MeOH/DMF (1:5, v/v)                                                 | MeOH/DMF (1:5, v/v)                                                 |
| Crystalline system, space group                                            | Triclinic, <i>P</i> -1                                              | Monoclinic, <i>P</i> 2 <sub>1</sub> / <i>c</i>                      | Triclinic, <i>P</i> -1                                              |
| <i>a</i> , <i>b</i> , <i>c</i> (Å)                                         | 14.9621 (17),<br>17.7063 (18),<br>18.5333 (12)                      | 18.7005 (14), 14.5206<br>(12), 34.471 (2)                           | 14.4943 (9), 17.8480<br>(9), 18.7119 (8)                            |
| $\alpha$ , $\beta$ , $\gamma$ (°)                                          | 75.538 (8), 89.907<br>(8), 73.826 (10)                              | 90, 104.606 (8), 90                                                 | 106.539 (4), 90.018<br>(5), 105.413 (5)                             |
| Volume, (Å <sup>3</sup> )                                                  | 4553.9 (8)                                                          | 9057.7 (12)                                                         | 4458.3 (4)                                                          |
| $\rho$ , g cm <sup>-3</sup>                                                | 1.253                                                               | 1.545                                                               | 1.371                                                               |
| Z                                                                          | 12                                                                  | 24                                                                  | 12                                                                  |
| Temperature, (°C)                                                          | 25(2)                                                               | 25(2)                                                               | 25(2)                                                               |
| Radiation type                                                             | Cu K $\alpha$                                                       | Cu K $\alpha$                                                       | Cu K $\alpha$                                                       |
| $\mu$ (mm <sup>-1</sup> )                                                  | 0.62                                                                | 3.73                                                                | 2.29                                                                |
| Theta range for data collection                                            | 3.462° < 2 $\theta$ < 76.626°                                       | 3.903° < 2 $\theta$ < 72.127°                                       | 3.545° < 2 $\theta$ < 76.873°                                       |
| Index range                                                                | -18 ≤ <i>h</i> ≤ 18,<br>-22 ≤ <i>k</i> ≤ 23,<br>-23 ≤ <i>l</i> ≤ 14 | -23 ≤ <i>h</i> ≤ 22,<br>-17 ≤ <i>k</i> ≤ 16,<br>-40 ≤ <i>l</i> ≤ 42 | -11 ≤ <i>h</i> ≤ 18,<br>-22 ≤ <i>k</i> ≤ 19,<br>-23 ≤ <i>l</i> ≤ 23 |
| <b>Data collection</b>                                                     |                                                                     |                                                                     |                                                                     |
| Diffractometer                                                             | SuperNova, Dual, Cu at zero, Atlas                                  | SuperNova, Dual, Cu at zero, Atlas                                  | SuperNova, Dual, Cu at zero, Atlas                                  |
| Absorption correction                                                      | Multi-Scan (CrysAlis PRO 1.171.38.43)                               | Multi-Scan (CrysAlis PRO 1.171.38.43)                               | Multi-Scan (CrysAlis PRO 1.171.38.43)                               |
| T <sub>min</sub> , T <sub>max</sub>                                        | 0.400, 1.000                                                        | 0.112, 1.000                                                        | 0.816, 1.000                                                        |
| No. of measured, independent and observed reflections [I > 2 $\sigma$ (I)] | 36258, 18327, 8287                                                  | 39338, 17698, 8570                                                  | 35213, 17976, 13270                                                 |
| R <sub>int</sub>                                                           | 0.048                                                               | 0.091                                                               | 0.037                                                               |
| ( $\sin \theta/\lambda$ ) <sub>max</sub> (Å <sup>-1</sup> )                | 0.631                                                               | 0.617                                                               | 0.632                                                               |
| <b>Refinement</b>                                                          |                                                                     |                                                                     |                                                                     |
| R[F <sup>2</sup> > 2 $\sigma$ (F <sup>2</sup> )], wR(F <sup>2</sup> ), S   | 0.087, 0.311, 1.00                                                  | 0.104, 0.375, 1.06                                                  | 0.076, 0.237, 1.02                                                  |
| No. of reflections                                                         | 18327                                                               | 17698                                                               | 17976                                                               |



|                                                                 |                                  |                                  |                                  |
|-----------------------------------------------------------------|----------------------------------|----------------------------------|----------------------------------|
| Refined parameters                                              | 1195                             | 1217                             | 1226                             |
| No. of restraints                                               | 12                               | 21                               | 76                               |
| H-atoms treatment                                               | H-atom parameters<br>constrained | H-atom parameters<br>constrained | H-atom parameters<br>constrained |
| $\Delta\rho_{\max}, \Delta\rho_{\min}$ ( $e \text{ \AA}^{-3}$ ) | 0.40, -0.32                      | 1.01, -1.00                      | 0.80, -0.43                      |
